# Supplementary material
Source: MDPI journal article supplement (https://www.mdpi.com/2077-0472/12/5/692)
Supplement: s1 [file s1]

## Supplementary Material

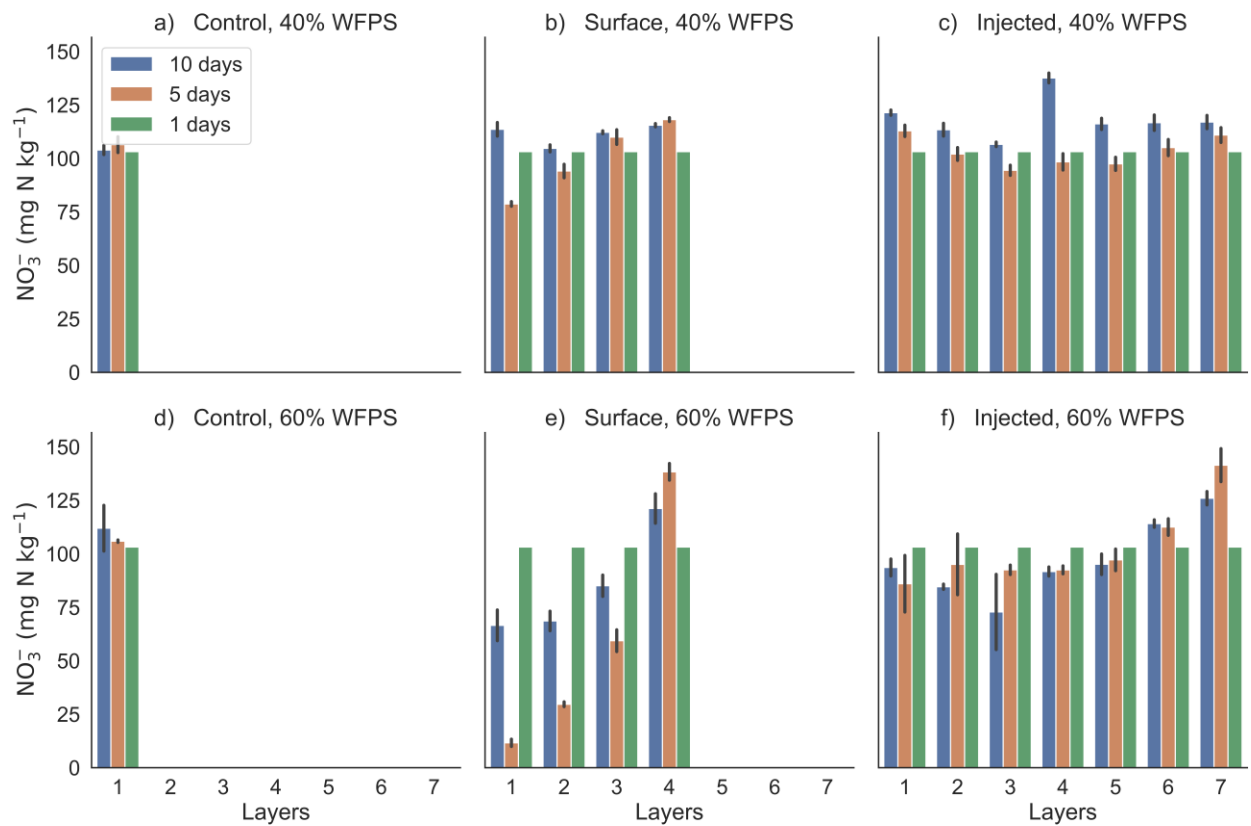

**Figure S1.** Nitrate concentration differences in soil layers between day 1, 5 and 10 of sampling of the control (one layer), surface (four layers) and injected (seven layers) manure treatments for two water contents (40 % and 60 % WFPS) and the standard deviation of the three parallel samples. The laboratory incubation was conducted with re-packed, sandy, arable soil from Fuhrberg, Germany

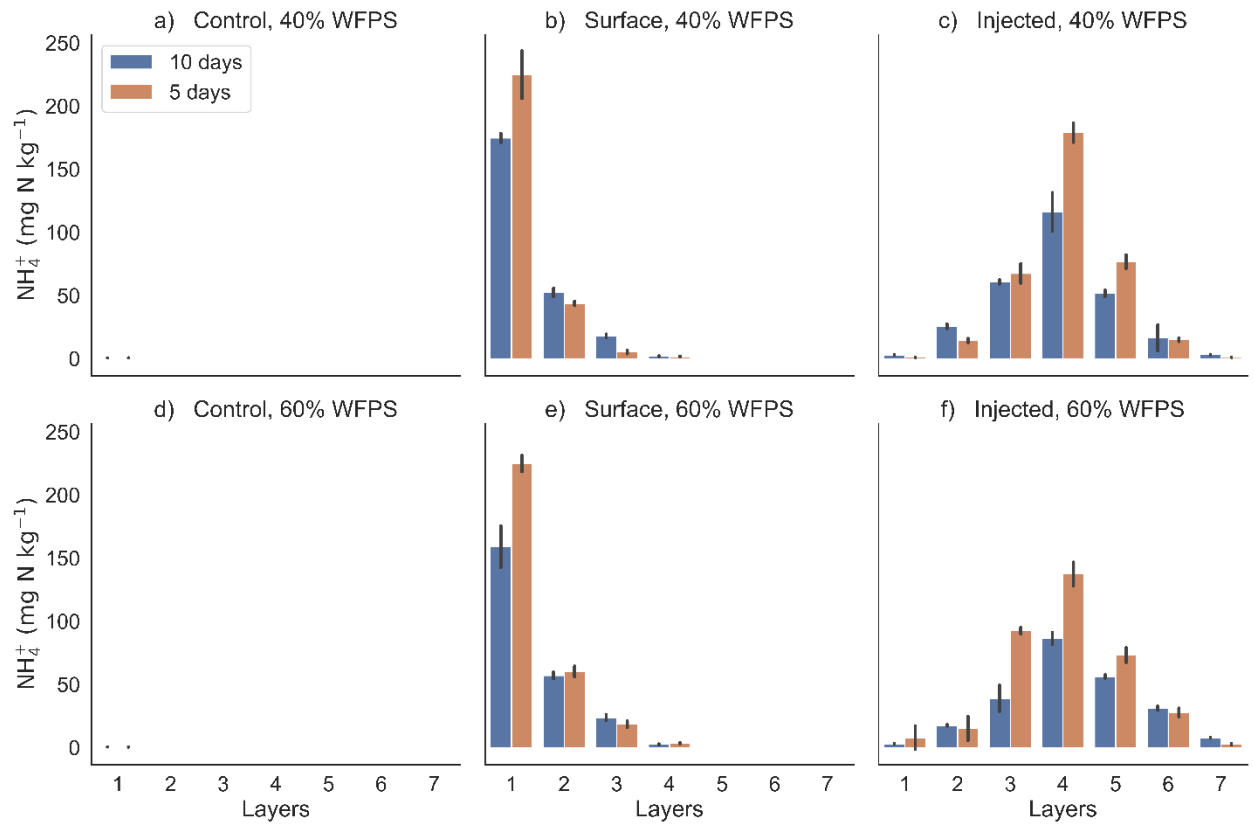

**Figure S2.** Differences in the ammonium concentration in soil layers between day 5 and day 10 of sampling of the control (one layer), surface (four layers) and injected (seven layers) manure treatments for two water contents (40 % and 60 % WFPS) and the standard deviation of the three parallel samples. The laboratory incubation was conducted with re-packed, sandy, arable soil from Fuhrberg, Germany

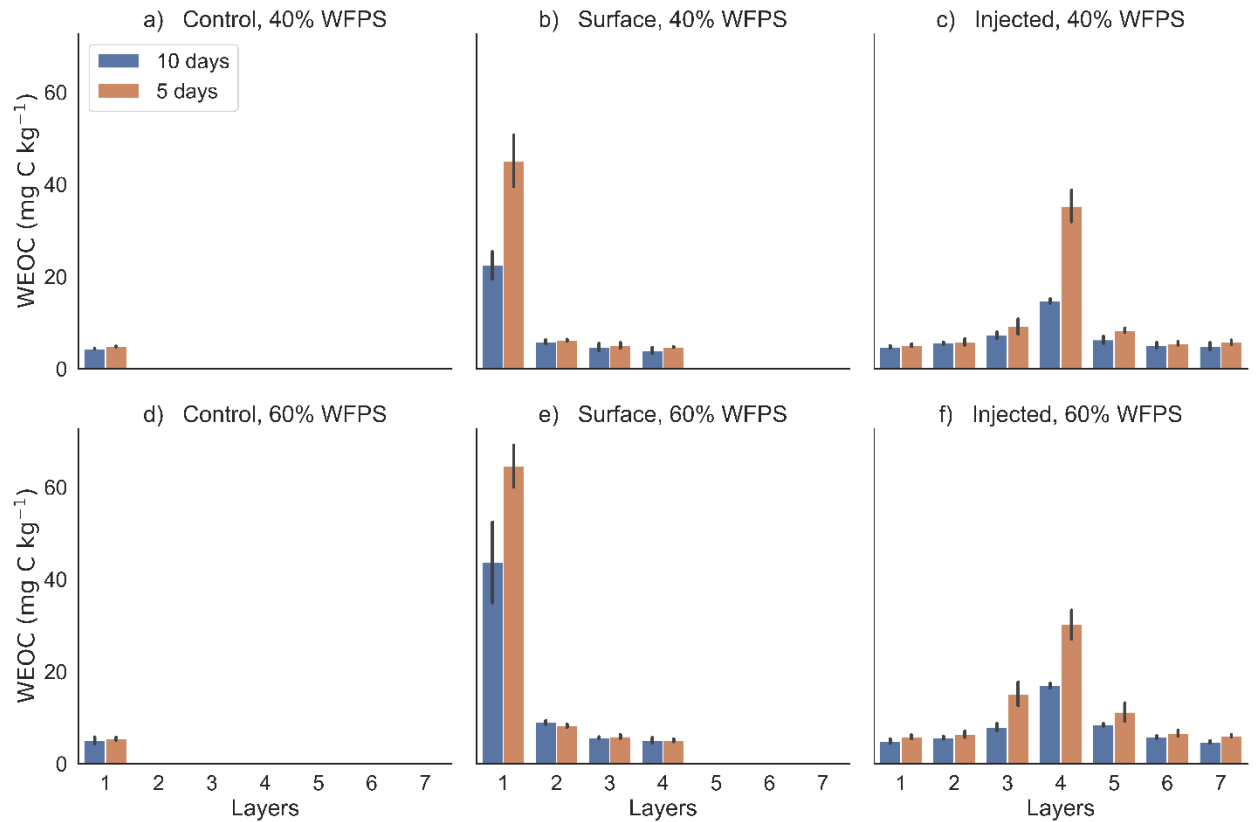

**Figure S3.** Water-extractable organic carbon (WEOC) concentration differences in soil layers between day 5 and day 10 sampling of the control (one layer), surface (four layers) and injected (seven layers) manure treatments for two water contents (40 % and 60 % WFPS) and the standard deviation of the three parallel samples. The laboratory incubation was conducted with re-packed, sandy, arable soil from Fuhrberg, Germany

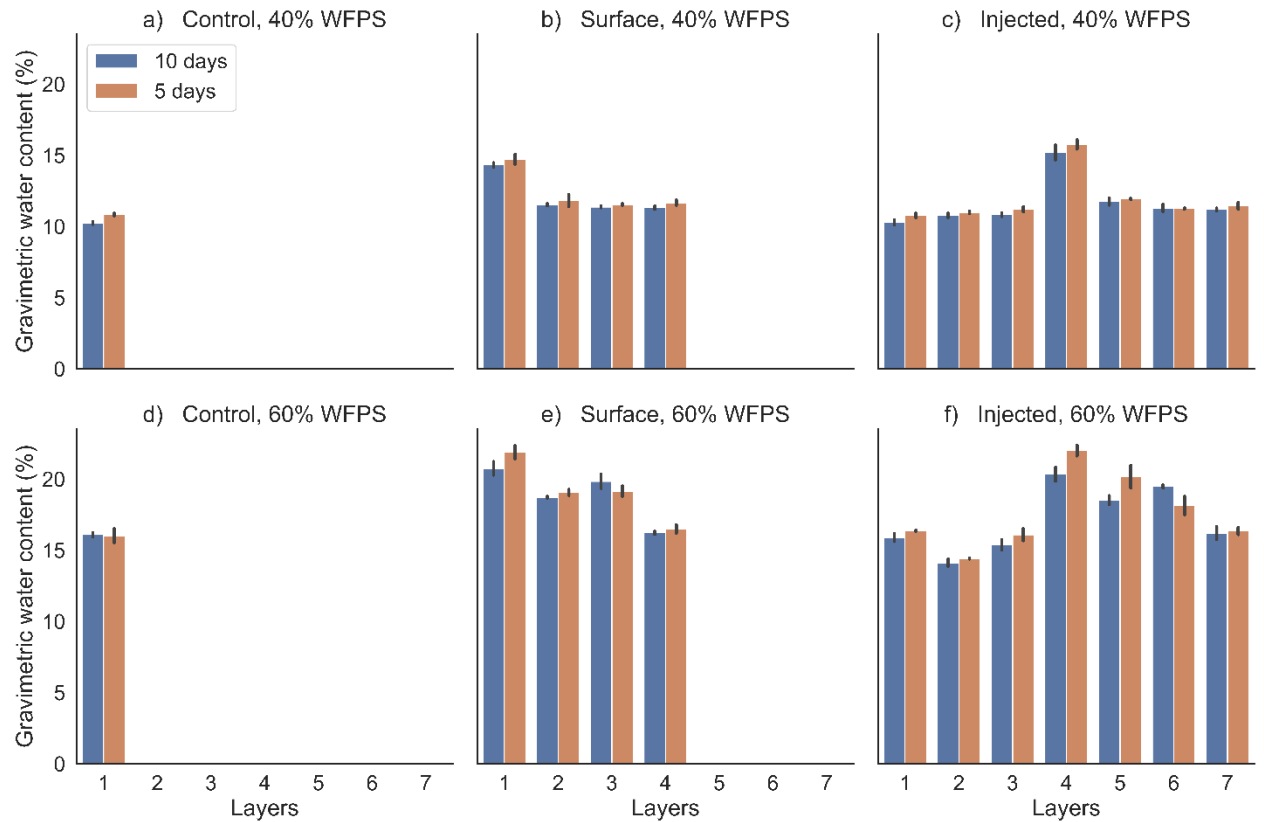

**Figure S4.** Gravimetric water content of soil layers between day 5 and day 10 sampling of the control (one layer), surface (four layers) and injected (seven layers) manure treatments for two water contents (40 % and 60 % WFPS) and the standard deviation of the three parallel samples. The laboratory incubation was conducted with re-packed, sandy, arable soil from Fuhrberg, Germany

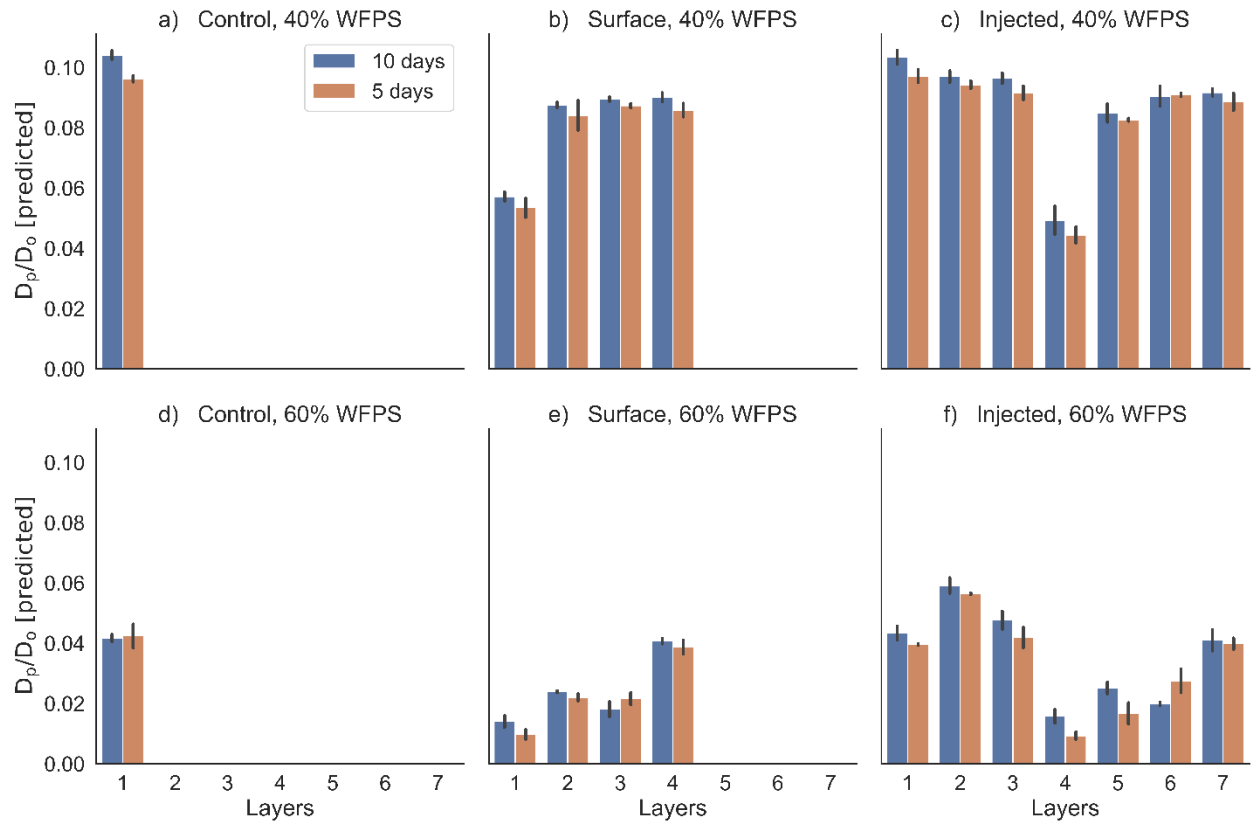

**Figure S5.** The calculated gas diffusivity based on the measured water content of soil layers between day 5 and day 10 of the control (one layer), surface (four layers) and injected (seven layers) manure treatments for two water contents (40 % and 60 % WFPS). The laboratory incubation was conducted with re-packed, sandy, arable soil from Fuhrberg, Germany

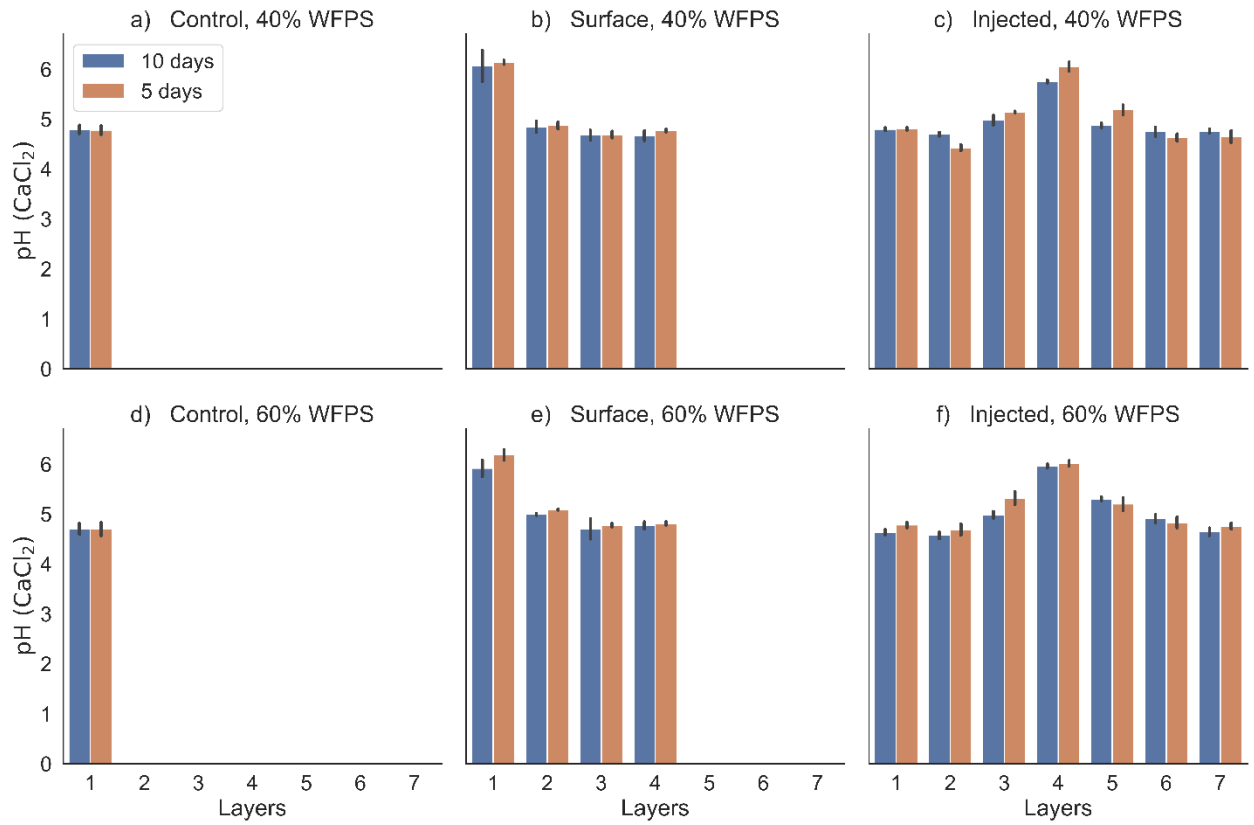

**Figure S6.** The pH of soil layers between day 5 and day 10 of the control (one layer), surface (four layers) and injected (seven layers) manure treatments for two water contents (40 % and 60 % WFPS). The laboratory incubation was conducted with re-packed, sandy, arable soil from Fuhrberg, Germany

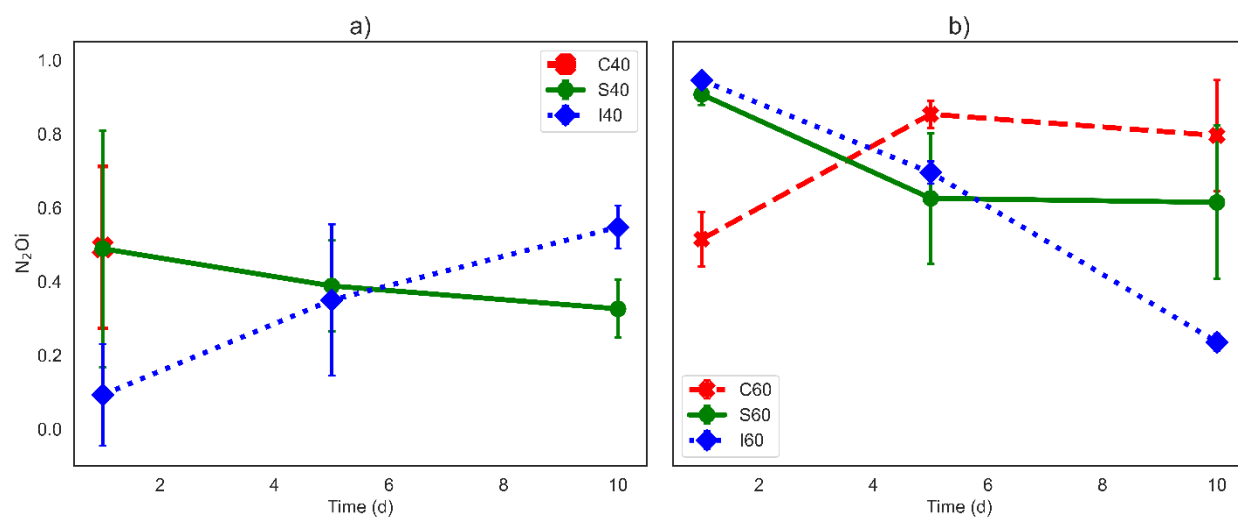

**Figure S7.** Time course of  $N_2O_i$  ( $fp\_N_2O/(fp\_N_2+fp\_N_2O)$ ) at day 1, 5 and 10 of the control, surface and injected (C, S, I) manure treatments for two water contents (40 % and 60 % WFPS). The laboratory incubation was conducted with re-packed, sandy, arable soil from Fuhrberg, Germany

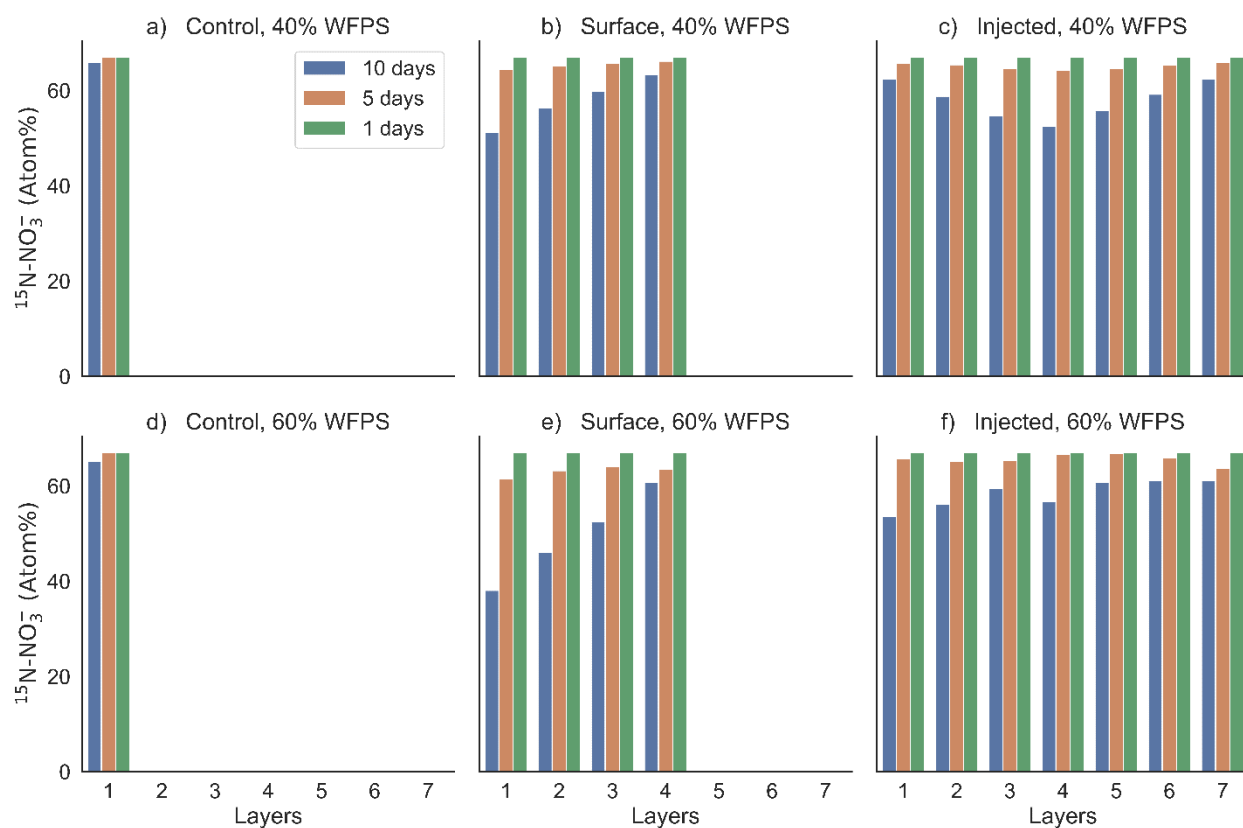

**Figure S8.** The  $^{15}\text{N-NO}_3^-$  atom% of soil layers between day 1, 5 and 10 of the control (one layer), surface (four layers) and injected (seven layers) manure treatments for two water contents (40 % and 60 % WFPS). The laboratory incubation was conducted with re-packed, sandy, arable soil from Fuhrberg, Germany



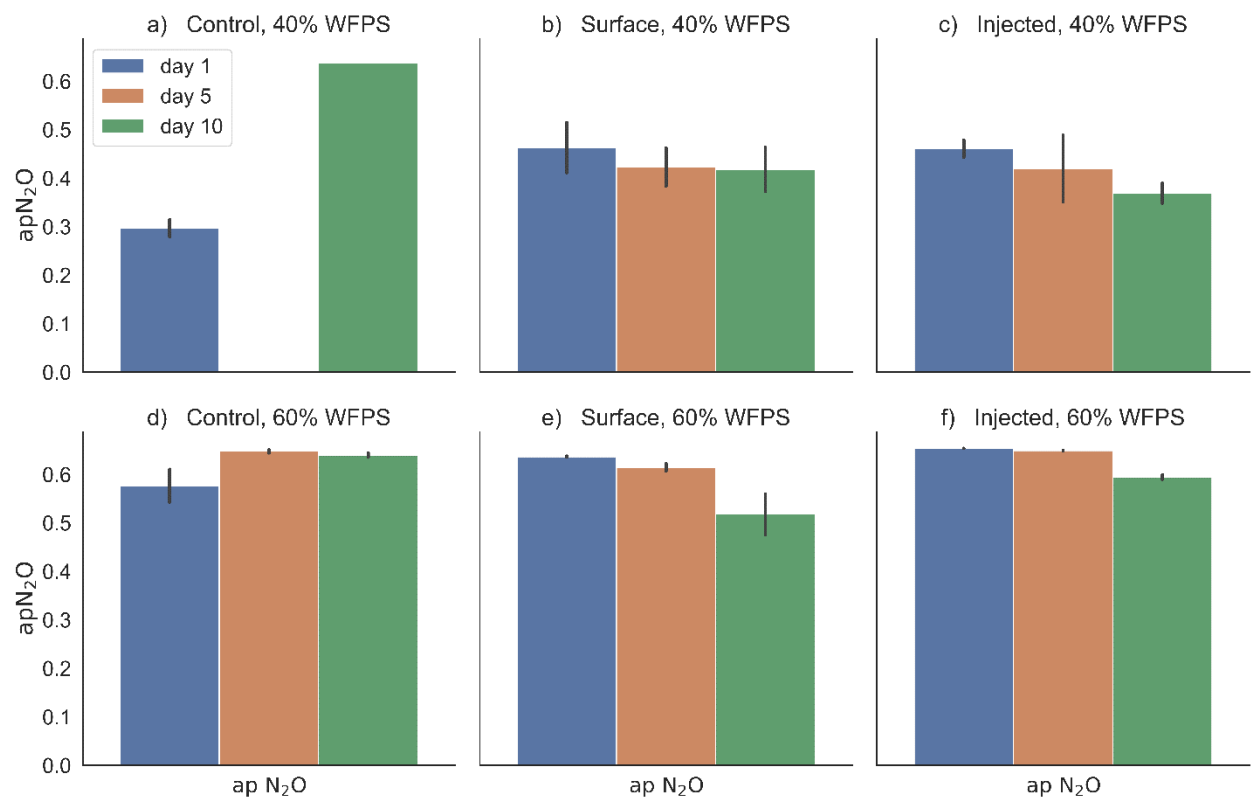

**Figure S9.** The  $apN_2O$  values between day 1, 5 and 10 of the control, surface and injected manure treatments for two water contents (40 % and 60 % WFPS). The laboratory incubation was conducted with re-packed, sandy, arable soil from Fuhrberg, Germany

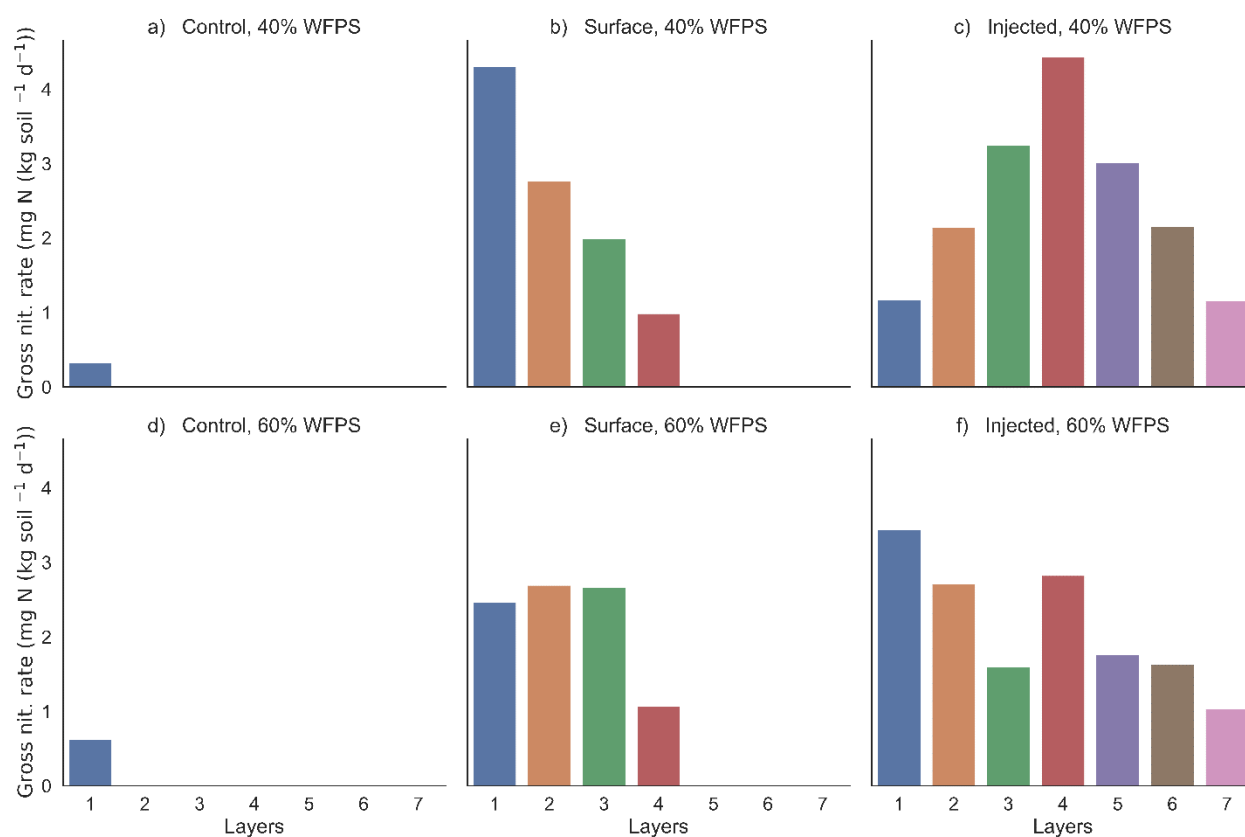

**Figure S10.** The gross nitrification rate of soil layers between day 5 and day 10 of the control (one layer), surface (four layers) and injected (seven layers) manure treatments for two water contents (40 % and 60 % WFPS). The laboratory incubation was conducted with re-packed, sandy, arable soil from Fuhrberg, Germany

**Table S1.** Physical and chemical data of four-week matured artificial manure mixture

|                       | Dry matter [%]           | Water content [%]        | pH (CaCl <sub>2</sub> )          | OM [%]                   | N-content<br>[mg N kg <sup>-1</sup> ] | NH <sub>4</sub> <sup>+</sup> -N<br>[mg N kg <sup>-1</sup> ] |
|-----------------------|--------------------------|--------------------------|----------------------------------|--------------------------|---------------------------------------|-------------------------------------------------------------|
|                       | 7.1                      | 92.9                     | 7.9                              | 82.0                     | 2.74                                  | 1.85                                                        |
| Measurement<br>method | DIN EN 15934:<br>2012-11 | DIN EN 15934:<br>2012-11 | DIN EN<br>12176 (S5):<br>1998-06 | DIN EN 15935:<br>2012-11 | DIN EN 16168:<br>2012-11              | DIN 38406-5-2:<br>1983-10                                   |

## Data derived from the $^{15}\text{N}$ gas flux method

### Calculation

The approach of [1–6] was used to calculate the denitrification source-specific  $\text{N}_2$  and  $\text{N}_2\text{O}$  ( $ap\text{N}_2\text{O}$ ,  $ap\text{N}_2+\text{N}_2\text{O}$  and  $ap\text{N}_2$ ) fluxes from the  $^{15}\text{N}$ - $\text{NO}_3^-$  enriched active pool (ap).

$$ap = ({}^{30}\chi_M - a_M \cdot a_{bgd}) / (a_M - a_{bgd}) \quad (\text{S1})$$

where  ${}^{30}\chi_M$  is the fraction of  ${}^{30}\text{N}_2$  in gas mixture of the sample,  $a_M$  describes the  $^{15}\text{N}$  abundance in the gas mixture and  $a_{bgd}$  describes the  $^{15}\text{N}$  abundance of the background (non-labelled N pool gas mixture in the headspace).

$${}^{30}\chi_M = {}^{30}\text{R} / (1 + {}^{29}\text{R} + {}^{30}\text{R}) \quad (\text{S2})$$

$$a_M = ({}^{29}\text{R} + {}^{30}\text{R}) / (2 * (1 + {}^{29}\text{R} + {}^{30}\text{R})) \quad (\text{S3})$$

The fraction originating from the  $^{15}\text{NO}_3^-$  pool undergoing denitrification ( $Fp$ ) of  $\text{N}_2\text{O}$  ( $Fp\_N_2\text{O}$ ),  $\text{N}_2+\text{N}_2\text{O}$  ( $Fp\_N_2+\text{N}_2\text{O}$ ) and  $\text{N}_2$  ( $Fp\_N_2$ ) within the sample is given as:

$$Fp = (a_M - a_{bgd}) / (a_P - a_{bgd}) \quad (\text{S4})$$

The concentration of the pool-derived  $\text{N}_2$  ( $fp\_N_2$ ),  $\text{N}_2+\text{N}_2\text{O}$  ( $fp\_N_2+\text{N}_2\text{O}$ ):

$$fp = Fp * cN \quad (\text{S5})$$

where  $cN$  is the total  $\text{N}_2$ ,  $\text{N}_2+\text{N}_2\text{O}$  and  $\text{N}_2\text{O}$  concentration in the sample derived from the IRMS peaks.

## References:

1. Spott, O.; Russow, R.; Apelt, B.; Stange, C.F. A<sup>15</sup>N-Aided Artificial Atmosphere Gas Flow Technique for Online Determination of Soil N<sub>2</sub> Release Using the Zeolite K strolith SX6 . *Rapid Communications in Mass Spectrometry* **2006**, *20*, 3267–3274, doi:10.1002/rcm.2722.
2. Buchen, C.; Lewicka-Szczebak, D.; Fu , R.; Helfrich, M.; Flessa, H.; Well, R. Fluxes of N<sub>2</sub> and N<sub>2</sub>O and Contributing Processes in Summer after Grassland Renewal and Grassland Conversion to Maize Cropping on a Plaggic Anthrosol and a Histic Gleysol. *Soil Biology and Biochemistry* **2016**, *101*, 6–19, doi:10.1016/j.soilbio.2016.06.028.
3. Lewicka-Szczebak, D.; Augustin, J.; Giesemann, A.; Well, R. Quantifying N<sub>2</sub>O Reduction to N<sub>2</sub> Based on N<sub>2</sub>O Isotopocules – Validation with Independent Methods (Helium Incubation and <sup>15</sup>N Gas Flux Method). *Biogeosciences* **2017**, *14*, 711–732, doi:10.5194/bg-14-711-2017.
4. Lewicka-Szczebak, D.; Well, R. The <sup>15</sup>N Gas-Flux Method to Determine N<sub>2</sub> Flux: A Comparison of Different Tracer Addition Approaches. *SOIL* **2020**, *6*, 145–152, doi:10.5194/soil-6-145-2020.
5. Rummel, P.S.; Pfeiffer, B.; Pausch, J.; Well, R.; Schneider, D.; Dittert, K. Maize Root and Shoot Litter Quality Controls Short-Term CO<sub>2</sub> and N<sub>2</sub>O Emissions and Bacterial Community Structure of Arable Soil. *Biogeosciences* **2020**, *17*, 1181–1198, doi:10.5194/bg-17-1181-2020.
6. Kemmann, B.; W hl, L.; Fu , R.; Schrader, S.; Well, R.; Ruf, T. N<sub>2</sub> and N<sub>2</sub>O Mitigation Potential of Replacing Maize with the Perennial Biomass Crop *Silphium Perfoliatum* — An Incubation Study. *GCB Bioenergy* **2021**, *13*, 1649–1665, doi:10.1111/gcbb.12879.
