# Supplementary material
Source: MDPI journal article supplement (https://www.mdpi.com/2077-0472/12/5/692)
Supplement: s1 [file s1]

Archive with 1 entries (1 files):
- agriculture-1661487-supplementary.pdf
